# Supplementary material for: Soft route for monodisperse gold nanoparticles confined within SH-functionalized walls of mesoporous silica
Source: Royal Society of Chemistry journal article supplement (doi:10.1039/b902568e), 2009-01-01

# Soft route for monodisperse gold nanoparticles confined within SH-functionalized walls of mesoporous silica

**Eric Besson, Ahmad Mehdi\*, Catherine Reyé and Robert Corriu**

*Institut Charles Gerhardt, Chimie Moléculaire et Organisation du Solide, Université Montpellier, cc 1701. Place E. Bataillon, 34095  
Montpellier Cedex 5 France. Fax: 33 4 6714 3852; Tel: 33 4 6714 3038.*

*E-mail : [ahmad.mehdi@univ-montp2.fr](mailto:ahmad.mehdi@univ-montp2.fr)*

## Electronic Supplementary Information

ESI 1: X-Ray Diffraction patterns of  $X_{10}2$ ,  $X_{20}2$  and  $X_{40}2$

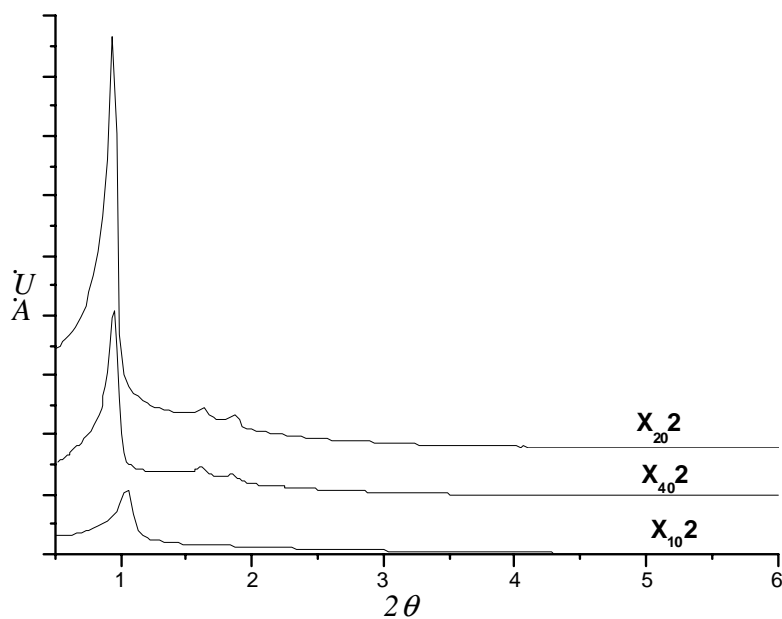

**ESI 2:** N<sub>2</sub> adsorption-desorption isotherms for **X<sub>40</sub>SH**, **X<sub>20</sub>SH** and **X<sub>10</sub>SH**

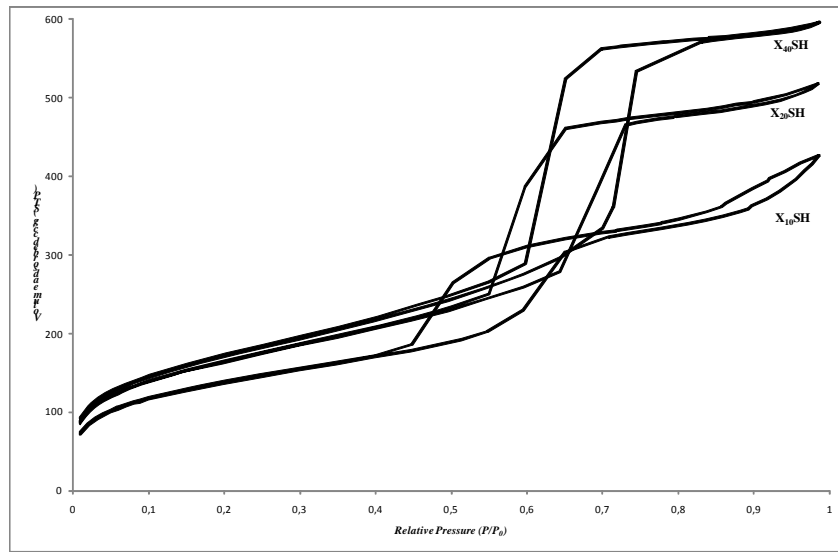

**ESI 3: X-Ray Diffraction patterns of  $X_{10}SH$ ,  $X_{20}SH$  and  $X_{40}SH$**

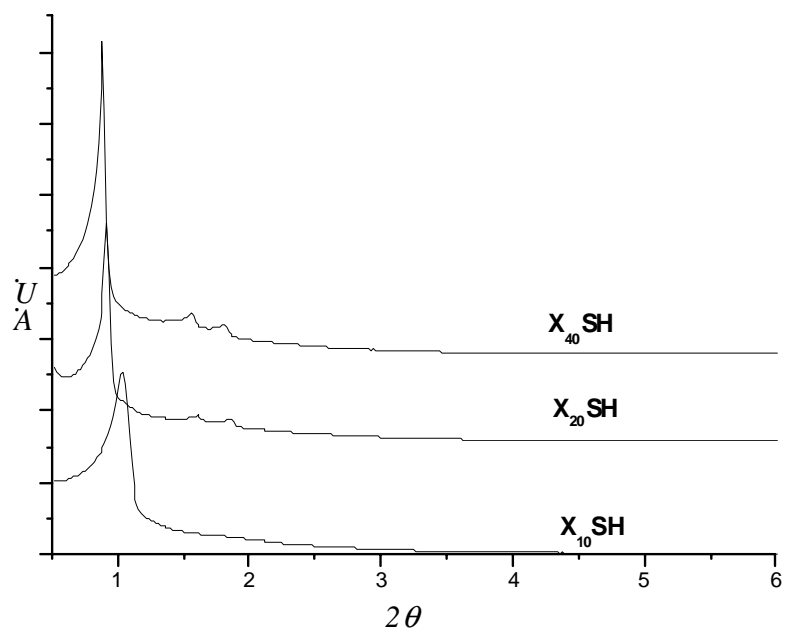

**ESI 4: X-Ray Diffraction patterns of  $X_{10}SH$ ,  $X_{20}SH$  and  $X_{40}SH$**

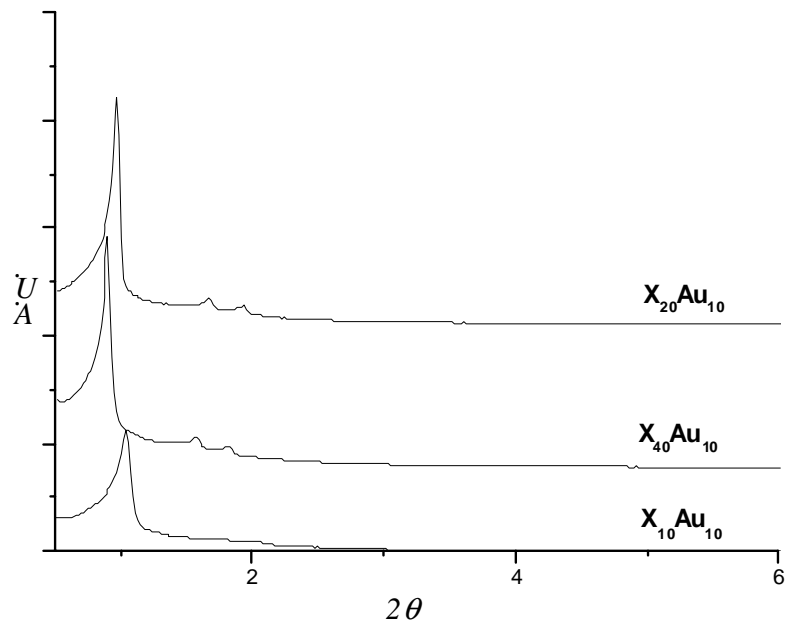

ESI 5: TEM image for  $X_{10}Au_{20}$ .

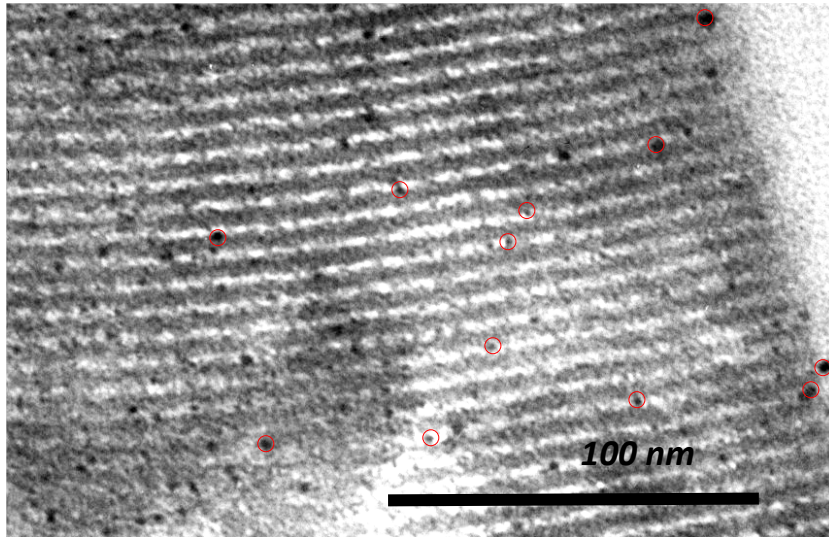

ESI 6: TEM image for AuNPs when starting from SBA-15 (Up) and from X<sub>20</sub>2 (Bottom).

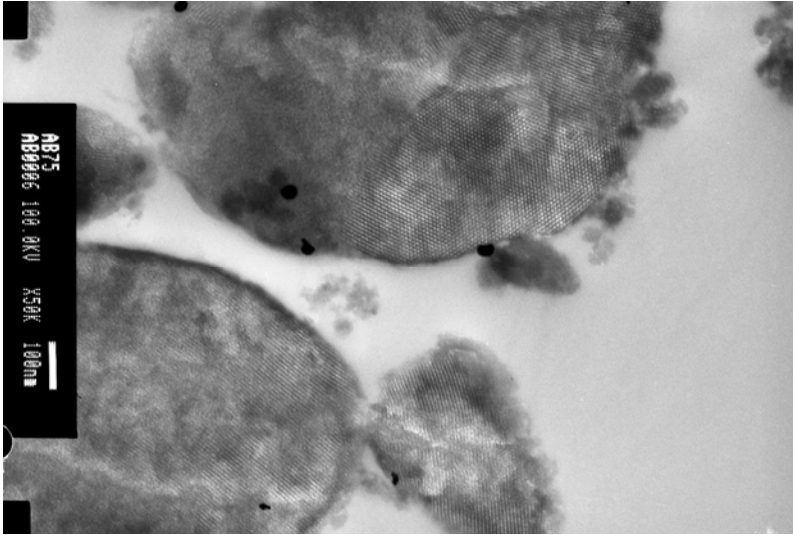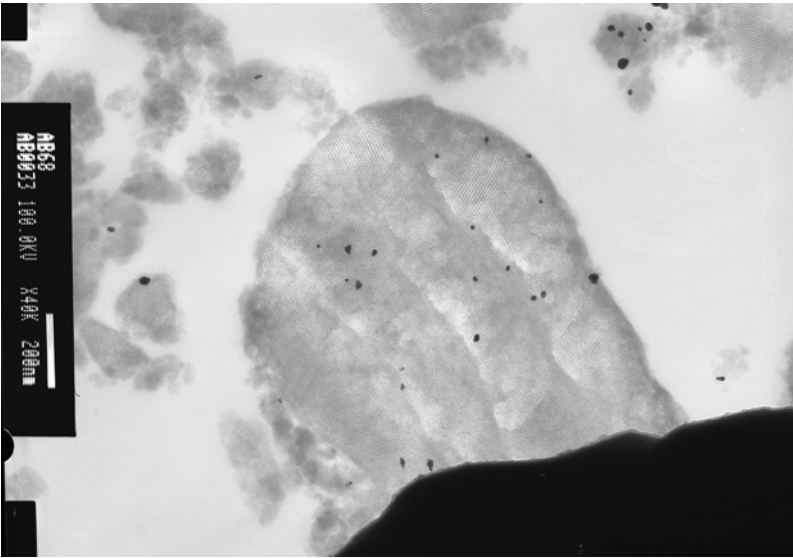

**ESI 7:** TEM image showing the evolution of AuNPs in  $X_{10}Au_5$  after thermal treatment at 900°C.

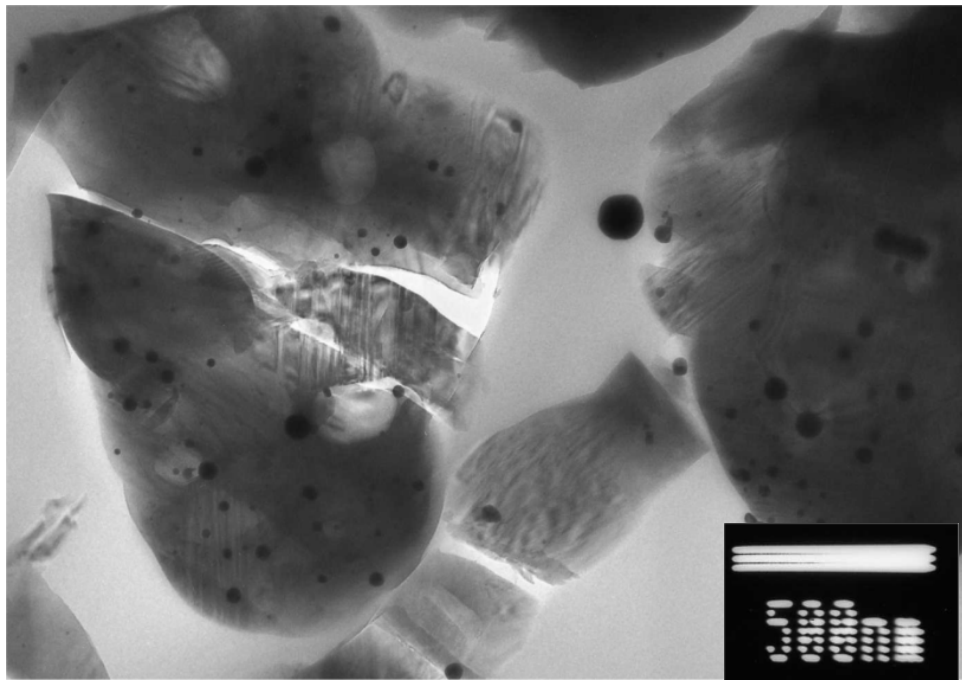

Supplement: b902568e.pdf [file b902568e.pdf]
